# Supplementary material for: Through Ageing, and Beyond: Gut Microbiota and Inflammatory Status in Seniors and Centenarians
Source: PubMed Central journal article supplement (PMC2871786; doi:10.1371/journal.pone.0010667), 2010-05-17

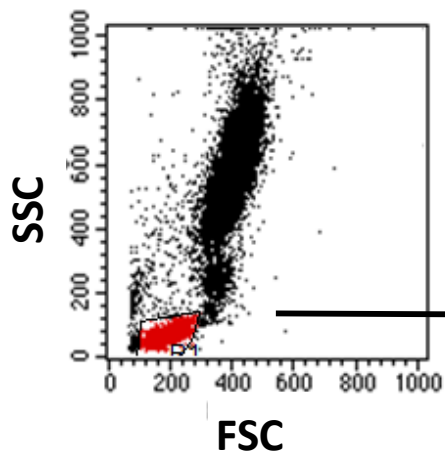

Gate: LYMPH  
 Gated Events: 50204  
 Total Events: 174707

| Gate  | Events | % Gate | % Total |
|-------|--------|--------|---------|
| LYMPH | 50204  | 100.00 | 28.75   |
| CD4+  | 28526  | 56.82  | 16.27   |

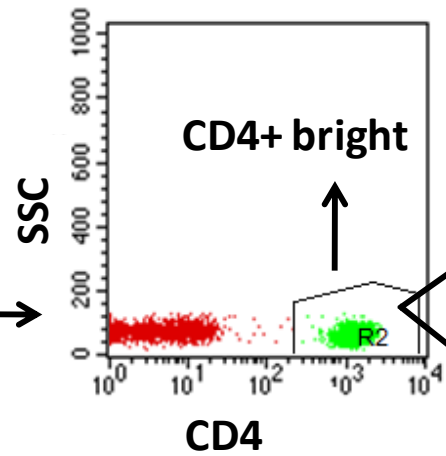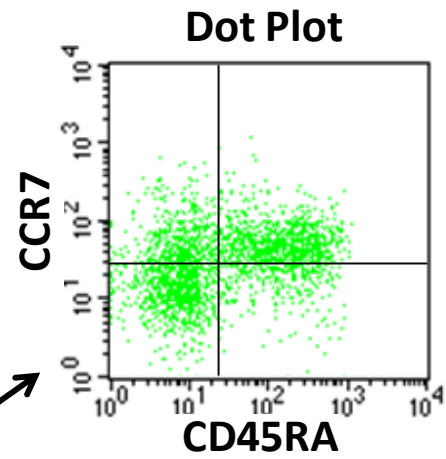

Gate: CD4+  
 Gated Events: 28526  
 Total Events: 174707  
 Quad Location: 23, 27

| Quac | Events | % Gate | % Total |
|------|--------|--------|---------|
| UL   | 6126   | 21.48  | 3.51    |
| UR   | 10465  | 36.69  | 5.99    |
| LL   | 8797   | 30.84  | 5.04    |
| LR   | 3138   | 11.00  | 1.80    |

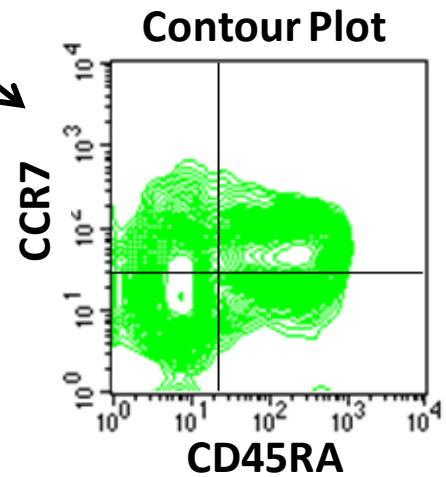

Supplement: pone.0010667.s002.pdf [file pone.0010667.s002.pdf]
