# Supplementary material for: Through Ageing, and Beyond: Gut Microbiota and Inflammatory Status in Seniors and Centenarians
Source: PubMed Central journal article supplement (PMC2871786; doi:10.1371/journal.pone.0010667), 2010-05-17
Supplement: pone.0010667.s003.pdf [file pone.0010667.s003.pdf]

**Supporting Table S1.** Health status and medication of centenarians, offspring of centenarians, and unrelated elderly subjects included in the study<sup>a</sup>.

| <b>HEALTH STATUS</b>                                                           | <b>Centenarians (C, n=21)</b> | <b>Elderly (E, n=22)</b> | <b>Offspring (F, n=21)</b> |
|--------------------------------------------------------------------------------|-------------------------------|--------------------------|----------------------------|
| <b>Mild Cognitive impairment (<math>18 \leq \text{SMMSE}^b \leq 23</math>)</b> | 3                             | 0                        | 0                          |
| <b>Severe Cognitive impairment (<math>\text{SMMSE}^b \leq 17</math>)</b>       | 8                             | 0                        | 0                          |
| <b>SMMSE<sup>a</sup> not assessed for sensory impairment<sup>c</sup></b>       | 4                             | 0                        | 0                          |
| <b>Moderately disabled (ADL<sup>d</sup>: 1-2 disabilities)</b>                 | 4                             | 0                        | 0                          |
| <b>Severely disabled (ADL<sup>d</sup>: 3-5 disabilities)</b>                   | 5                             | 0                        | 0                          |
| <b>MEDICATION</b>                                                              |                               |                          |                            |
| <b>Antiinflammatory drugs<sup>e</sup></b>                                      | 3                             | 3                        | 4                          |
| <b>Cardiovascular therapy</b>                                                  | 15                            | 6                        | 4                          |
| <b>Antihypertensive therapy</b>                                                | 10                            | 12                       | 7                          |
| <b>Antidiabetic Therapy</b>                                                    | 1                             | 3                        | 0                          |
| <b>Drugs affecting lipoprotein metabolism<sup>f</sup></b>                      | 0                             | 11                       | 4                          |
| <b>Micronutrients o vitamins</b>                                               | 4                             | 1                        | 1                          |
| <b>Laxatives</b>                                                               | 1                             | 0                        | 0                          |
| <b>Liver-biliary therapy</b>                                                   | 0                             | 1                        | 1                          |
| <b>Gastro-intestinal disorders drugs</b>                                       | 5                             | 1                        | 0                          |
| <b>Acid secretion drugs</b>                                                    | 8                             | 4                        | 2                          |
| <b>Gout medication</b>                                                         | 1                             | 1                        | 0                          |
| <b>Osteoporosis drugs</b>                                                      | 1                             | 5                        | 2                          |
| <b>Thyroid therapy</b>                                                         | 0                             | 3                        | 0                          |
| <b>Miscellaneous central nervous system agents</b>                             | 6                             | 8                        | 5                          |
| <b>Respiratory agents</b>                                                      | 1                             | 5                        | 0                          |
| <b>Vasoprotective agents</b>                                                   | 1                             | 1                        | 0                          |

<sup>a</sup>Young subjects were all in good physical and free of medication.

<sup>b</sup>Standardized Mini Mental State Examination (SMMSE) (Folstein et al, J Psychiatr Res, 1975 ). The score used in the analysis was corrected by age and years of educations (Magni et al, Int Psychogeriatr, 1996).

<sup>c</sup>These subjects were apparently in good cognitive condition.

<sup>d</sup>Index of Independence in Activities of Daily Living (adapted from Katz et al, Gerontologist, 1970).

<sup>e</sup>Nonsteroidal Antiinflammatory Drugs (NSAIDs) and Corticosteroids.

<sup>f</sup>Statins and fibric acid.
